# Supplementary material for: The role of structured water in mediating general anesthetic action on α4β2 nAChR
Source: Royal Society of Chemistry journal article supplement (doi:10.1039/c003573d), 2010-01-01
Supplement: c003573d.pdf [file c003573d.pdf]

## Supporting Information

### The Role of Structured Water in Mediating General Anesthetic Action on $\alpha 4\beta 2$ nAChR

Dan Willenbring,<sup>†</sup> Yan Xu,<sup>†‡§</sup> and Pei Tang<sup>†‡¶\*</sup>

Departments of <sup>†</sup>Anesthesiology, <sup>‡</sup>Pharmacology and Chemical Biology, <sup>§</sup>Structural Biology, and <sup>¶</sup>Computational Biology, University of Pittsburgh School of Medicine, Pittsburgh, PA 15261

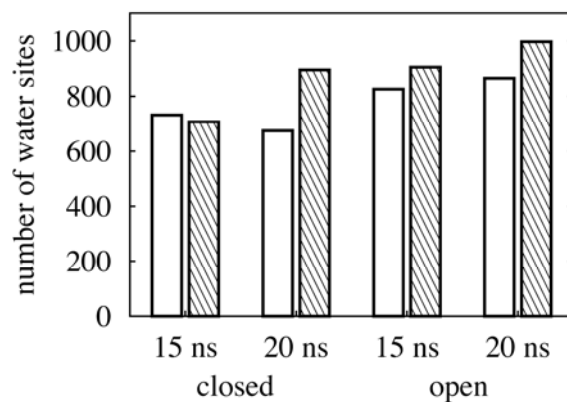

Figure S1: Number of partially occupied water sites, as measured by HOP analysis (see Methods Section), for closed- and open-channel  $\alpha 4\beta 2$  nAChR for each of the two time windows analyzed (10-15 ns and 15-20 ns). Open boxes indicate control systems and shaded boxes indicate systems with halothane.
